# Supplementary material for: Inhibition of endocytic lipid antigen presentation by common lipophilic environmental pollutants
Source: PubMed Central journal article supplement (PMC5437007; doi:10.1038/s41598-017-02229-7), 2017-05-18
Supplement: 41598_2017_2229_MOESM1_ESM.pdf [file 41598_2017_2229_MOESM1_ESM.pdf]

## **Inhibition of endocytic lipid antigen presentation by common lipophilic environmental pollutants**

Manju Sharma<sup>1</sup>, Xiang Zhang<sup>2</sup>, Shuangmin Zhang<sup>1</sup>, Liang Niu<sup>3</sup>, Shuk-mei Ho<sup>1</sup>, Aimin Chen<sup>4</sup>, Shouxiong Huang<sup>1,5\*</sup>

<sup>1</sup>Division of Environmental Genetics and Molecular Toxicology,

<sup>2</sup>Genomics, Epigenomics and Sequencing Core,

<sup>3</sup>Division of Biostatistics and Bioinformatics,

<sup>4</sup>Division of Epidemiology,

<sup>1,2,3,4</sup>Department of Environmental Health, University of Cincinnati College of Medicine, Cincinnati, OH 45267

\*Correspondence to Shouxiong Huang: [Shouxiong.huang@uc.edu](mailto:Shouxiong.huang@uc.edu)

### **Supplementary Information**

Seven supplemental figures and one supplemental table are included.

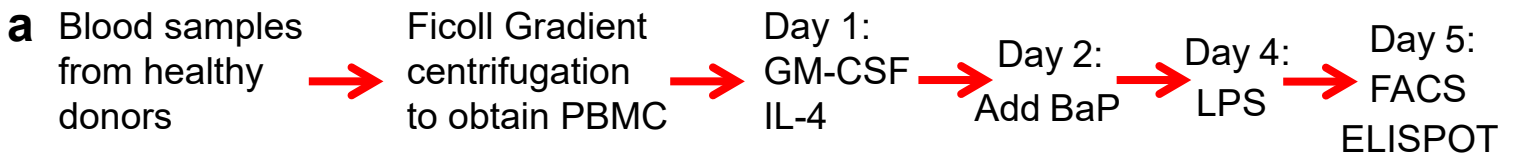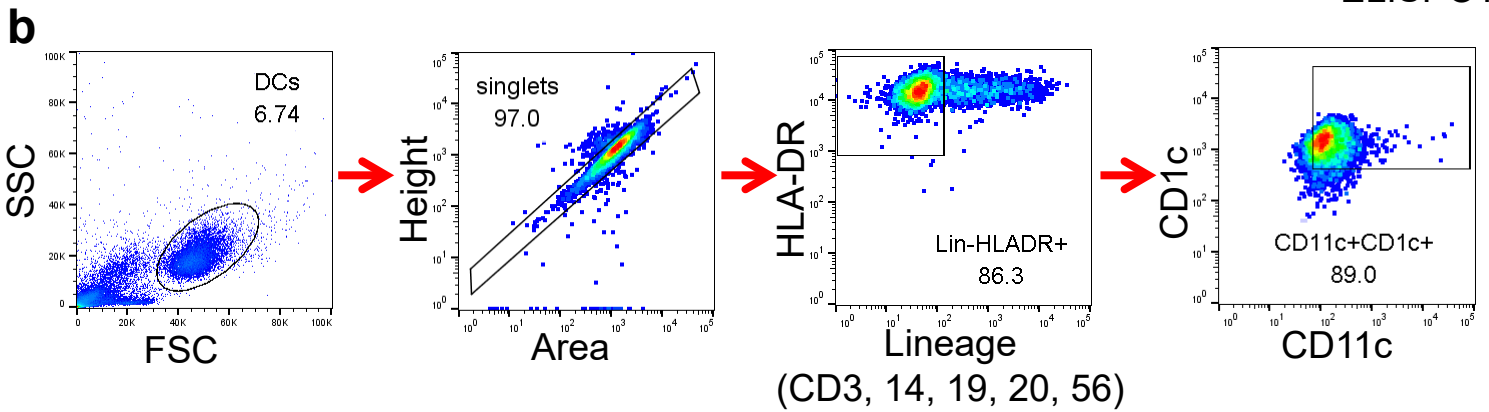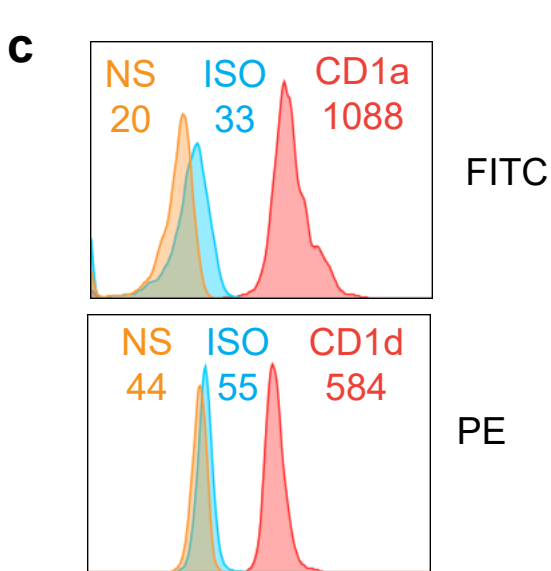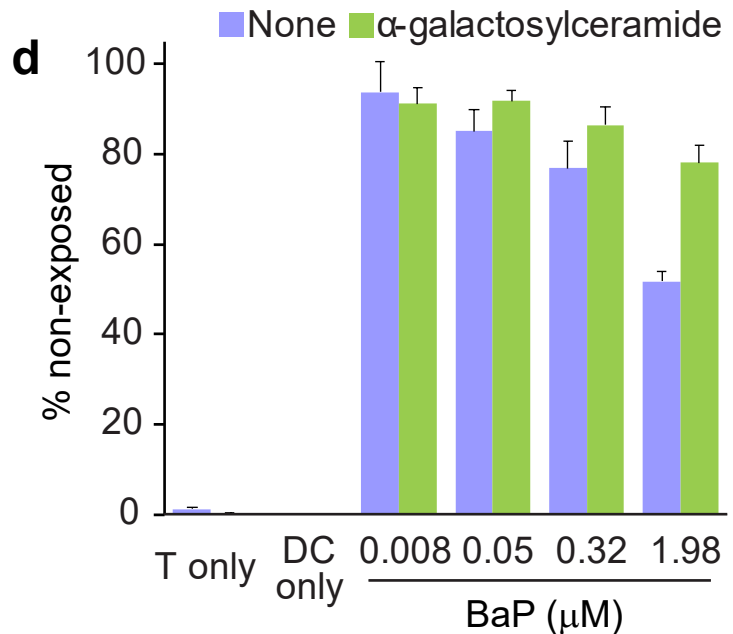

Supplemental Figure 1. Generation and gating of monocyte-derived dendritic cells, and impact of BaP exposure on  $\alpha$ -galactosylceramide presentation. Monocyte-derived DCs were differentiated using cytokines granulocyte macrophage colony-stimulating factor (GM-CSF, 300 U/ml) and interleukin-4 (IL-4, 200 U/ml), and activated using lipopolysaccharide (LPS, 50 ng/ml). PBMC: peripheral blood mononuclear cell. (a). Conventional dendritic cells (DCs) were gated on Lineage<sup>-</sup>HLA-DR<sup>+</sup>CD11c<sup>+</sup>CD1c<sup>+</sup> population (b). Fc receptor blocking antibodies efficiently blocked the background staining shown by isotype-matched irrelevant antibodies (ISO, blue) in comparison to non-stained (NS, yellow) and CD1 antibody staining (red) with indicated mean fluorescence intensity (c). Finally, only minimal impact of BaP exposure on the presentation of  $\alpha$ -galactosylceramide in DCs for NKT cell activation (J3N.5 cell line, green) was shown in comparison to the stronger impact on the presentation of endogenous lipid antigens (purple) using an ELISPOT assay (d). Error bars indicate the standard errors of triplicate samples from one donor and the data represent the independent experiments from two donors with similar results. DC only and T only represent control groups without DC and T cell co-culture.

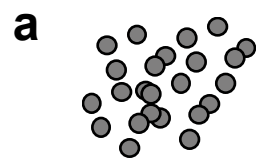

Vapor form of PAHs

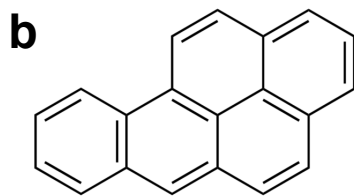

Chemical structure of  
benzo[a]pyrene

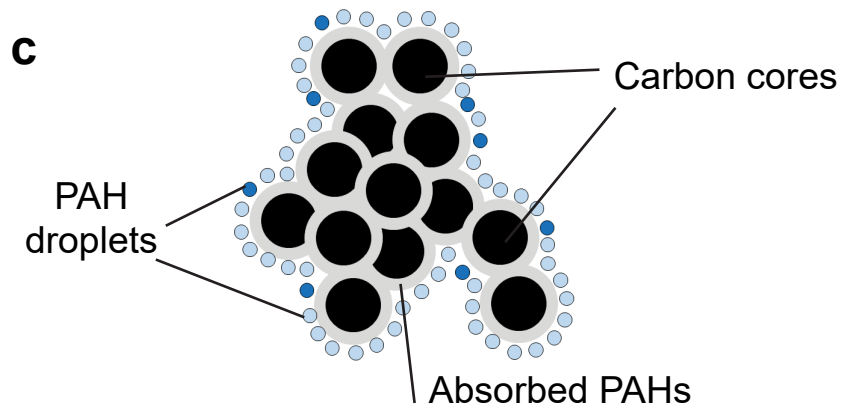

Particulate form of PAHs

Supplemental Figure 2. Schematic demonstration of the vapor form (a) of polycyclic aromatic hydrocarbons (PAHs) with the structure of benzo[a]pyrene (b) and the particulate form (diesel exhaust particle) of PAHs (c).

a. Primers used in real-time RT-PCR.

| Primer            | Amplicon size (bps) | Sequence: 5'→3'                 |
|-------------------|---------------------|---------------------------------|
| <i>IFIT1</i> -F   | 131                 | GGA AGG ATG GGC CTT GCT GA      |
| <i>IFIT1</i> -R   |                     | GGC GAT AGG CAG AGA TCG CA      |
| <i>IL22RA2</i> -F | 174                 | ACC CAA GTC AAT GGC TCT TTG TT  |
| <i>IL22RA2</i> -R |                     | CGC TCT GTG AGC CCC TTC ATA     |
| <i>CXCL10</i> -F  | 166                 | CCT GCA AGC CAA TTT TGT CCA C   |
| <i>CXCL10</i> -R  |                     | TCG ATT TTG CTC CCC TCT GGT     |
| <i>PPARG</i> -F   | 174                 | CCT CAT GAA GAG CCT TCC AAC T   |
| <i>PPARG</i> -R   |                     | GTG GAT CCG ACA GTT AAG ATC ACA |
| <i>APOE</i> -F    | 173                 | ACT GGC ACT GGG TCG CTT TT      |
| <i>APOE</i> -R    |                     | CCG GGG TCA GTT GTT CCT CC      |
| <i>GAPDH</i> -F   | 199                 | GAA GGT GAA GGT CGG AGT CA      |
| <i>GAPDH</i> -R   |                     | GAC AAG CTT CCC GTT CTC AG      |
| <i>B2M</i> -F     | 70                  | AAG TGG GAT CGA GAC ATG TAA GCA |
| <i>B2M</i> -R     |                     | GGA ATT CAT CCA ATC CAA ATG CGG |

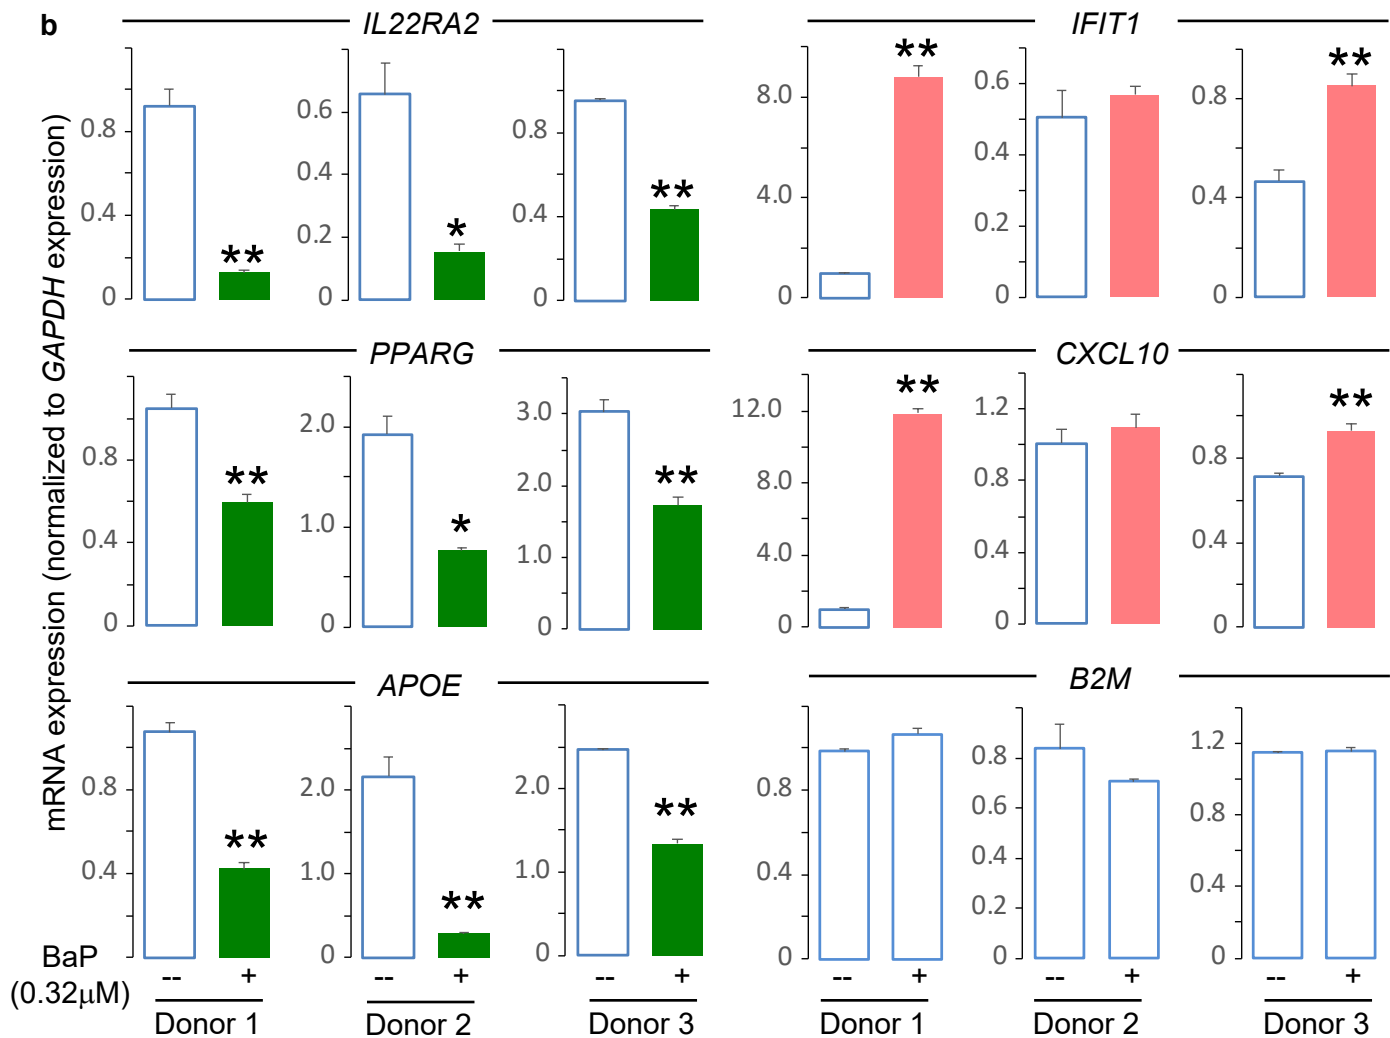

**Supplemental Figure 3.** Altered gene expression shown by RT-qPCR in BaP-exposed human dendritic cells. (a) primers for targeted gene amplification; (b) the expression level of targeted genes was normalized to that of the *GAPDH* gene. Gene expression in BaP-exposed and non-exposed DCs were compared using three individual donors. The standard errors were calculated from triplicate reactions. The p-values were calculated using student's t-test and shown as \*\* (P<0.01) or \* (P<0.05).

| <b>Genes</b> | <b>Description</b>                                  |
|--------------|-----------------------------------------------------|
| NCF1         | subunit of neutrophil NADPH oxidase                 |
| CXCR2        | a receptor for interleukin 8                        |
| MDM2         | nuclear-localized E3 ubiquitin ligase,              |
| ARAP3        | phosphoinositide binding protein                    |
| OLR1         | low density lipoprotein receptor                    |
| SMAD3        | transcriptional modulator activated by TGF- $\beta$ |
| ITGB5        | integrin, beta 5                                    |
| MARCO        | macrophage receptor with collagenous structure      |
| CTSB         | cathepsin B,                                        |
| ACP2         | lysosomal acid phosphatase                          |
| DYNC111      | dynein cytoplasmic 1 intermediate chain 1           |
| PSD3         | pleckstrin and Sec7 domain containing 3             |
| ASAH1        | acid ceramidase                                     |
| MSR1         | macrophage scavenger receptors                      |
| DNASE2       | deoxyribonuclease II, lysosomal                     |
| THBS3        | Thrombospondin family protein                       |
| LAMP1        | Lysosomal-associated membrane protein 1             |
| DNAJC6       | DnaJ (Hsp40) homolog                                |
| SMPD1        | phingomyelin phosphodiesterase 1                    |
| CTSD         | cathepsin D                                         |
| CXCR4        | chemokine receptor                                  |
| NPC1         | Niemann-Pick disease, type C1                       |
| GM2A         | GM2 ganglioside activator                           |
| CTSL         | cathepsin L,                                        |

Supplemental Figure 4. The list of genes from the clusters (purple) involving endocytic functions in Fig. 3b.

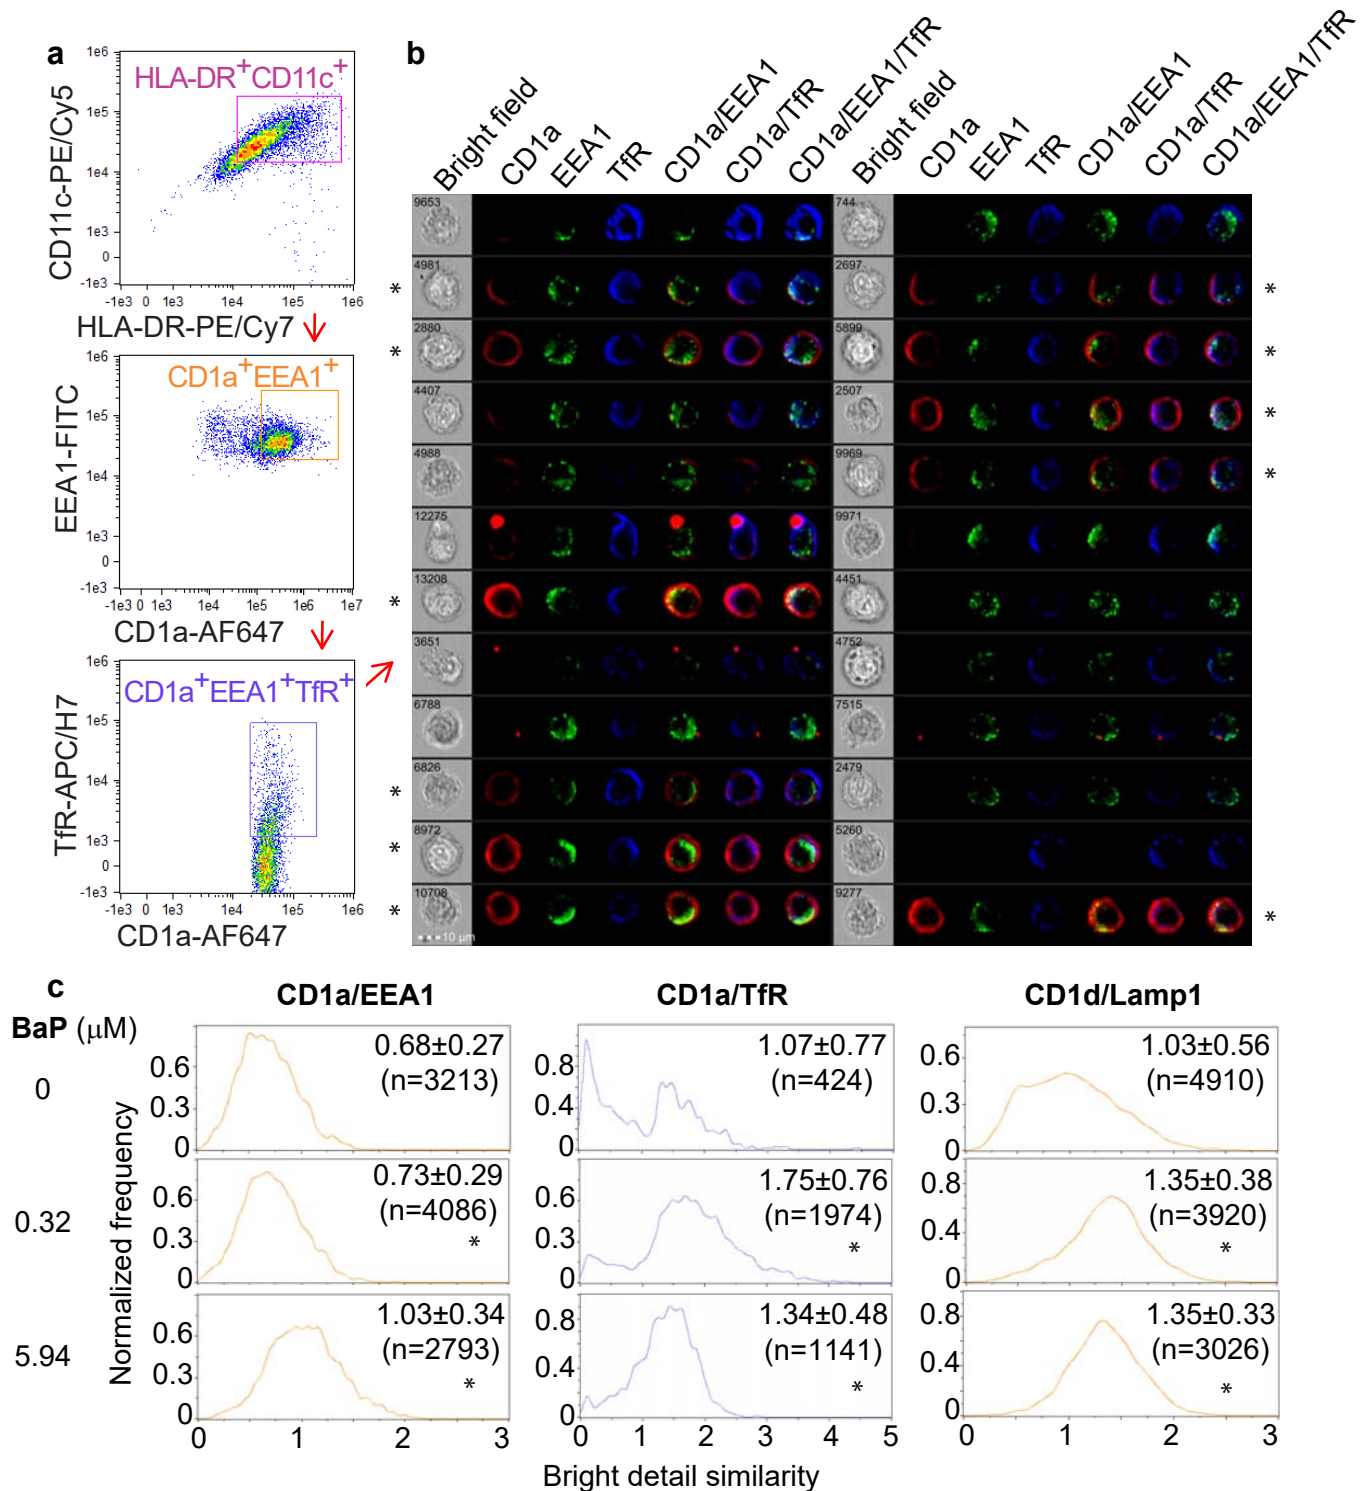

**Supplemental Figure 5.** Analysis of cellular images using IDEAS software. (a) Monocyte-derived DCs from healthy donors were firstly gated on HLA-DR<sup>+</sup>CD11c<sup>+</sup> cells and further gated on CD1a<sup>+</sup>EEA1<sup>+</sup> cells and CD1a<sup>+</sup>EEA1<sup>+</sup>Tfr<sup>+</sup> cells. (b) Cellular images were extracted from the HLA-DR<sup>+</sup>CD11c<sup>+</sup>CD1a<sup>+</sup>EEA1<sup>+</sup>Tfr<sup>+</sup> subset based on two technical criteria: strong co-stain of CD1a, EEA1, and Tfr proteins, and subcellular localization of staining. The examples of co-stained cells (\*) extracted for further co-localization analysis using ImageJ-Fiji software are shown. Unannotated cells showing invisible or excessive staining, or lack of visual subcellular distribution from some channels at this threshold setting were not extracted. These criteria were applied to all gated cell subsets and all BaP-exposed conditions for co-localization analysis using ImageJ-Fiji software. (c) Bright detail similarity was also calculated using IDEAS software according to the manufacturer's instructions. The mean of bright detail similarity was shown for different BaP-exposed conditions and different combinations of co-localized molecules. Mean  $\pm$  standard deviation of bright detail similarity and the gated cellular events (n) were shown. Statistical significance ( $p < 0.0001$ ) was obtained for BaP-exposed conditions (\*) with student's t-tests in comparison to non-exposed conditions. Data are from one experiment using cells from an independent donor. Two experiments were performed with similar results

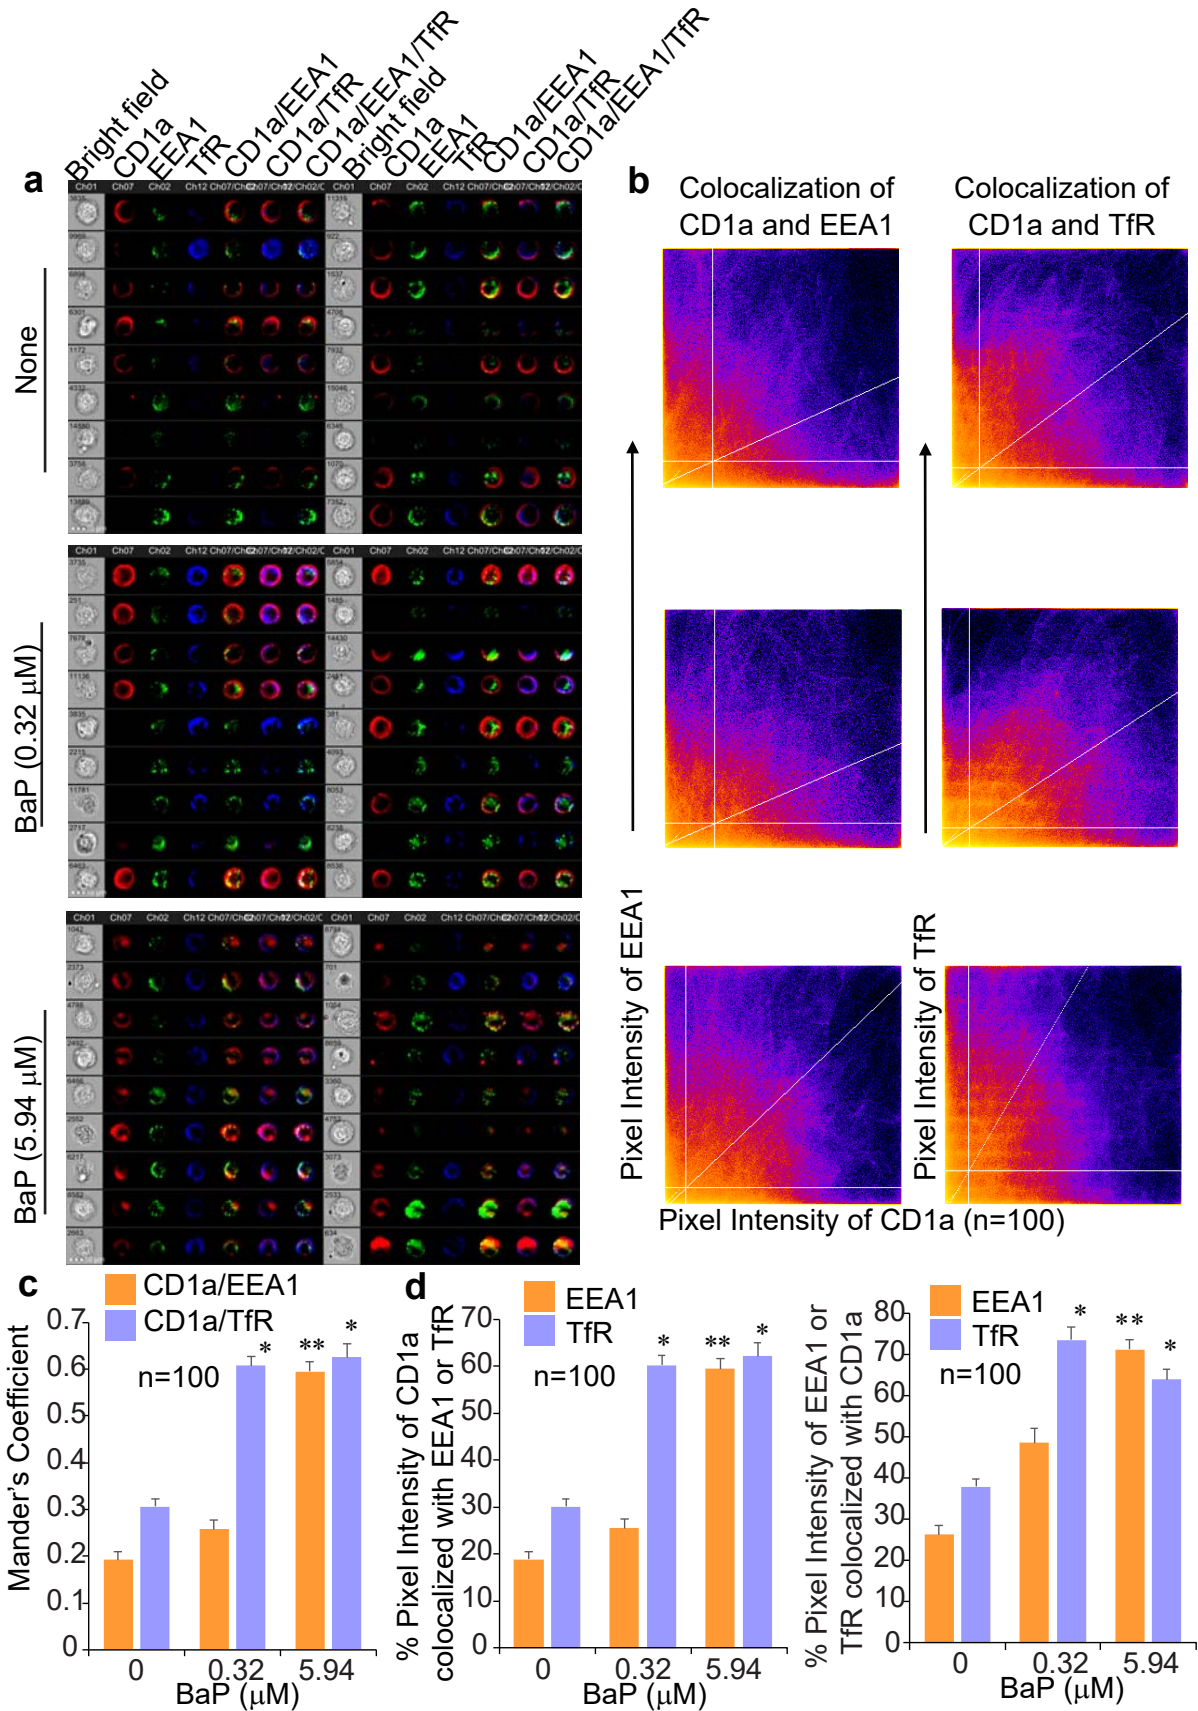

**Supplemental Figure 6.** CD1a protein retained in early and recycling endosomes using a duplicated analysis with 100 cellular images. Gated HLA-DR<sup>+</sup>CD11c<sup>+</sup>CD1a<sup>+</sup>EEA1<sup>+</sup>TfR<sup>+</sup> population from each BaP-exposed condition are shown with cell identities (numbers) and size bars (a). A hundred of cells with strong co-stain and visible subcellular localization of CD1a, EEA1, and TfR proteins were extracted as exemplified in Supplemental Fig. 5b for analysis using ImageJ-Fiji. The co-localization of pixel intensity between different channels is visualized with scatterplots (b), in which the horizontal and vertical lines represent Costes's thresholds and the diagonal lines represent the ratio of overall pixel intensity between two channels. Moreover, co-localized areas were quantified with the Mander's coefficient between CD1a and EEA1 proteins, and between CD1a and TfR proteins (c). Finally, the percentage of co-localized pixel intensity is also shown (d). Statistical significance ( $p < 0.001$ ) was obtained with student's t-tests in comparison to the non-exposed group (\*) or together with lower exposure group (\*\*) with indicated standard errors.

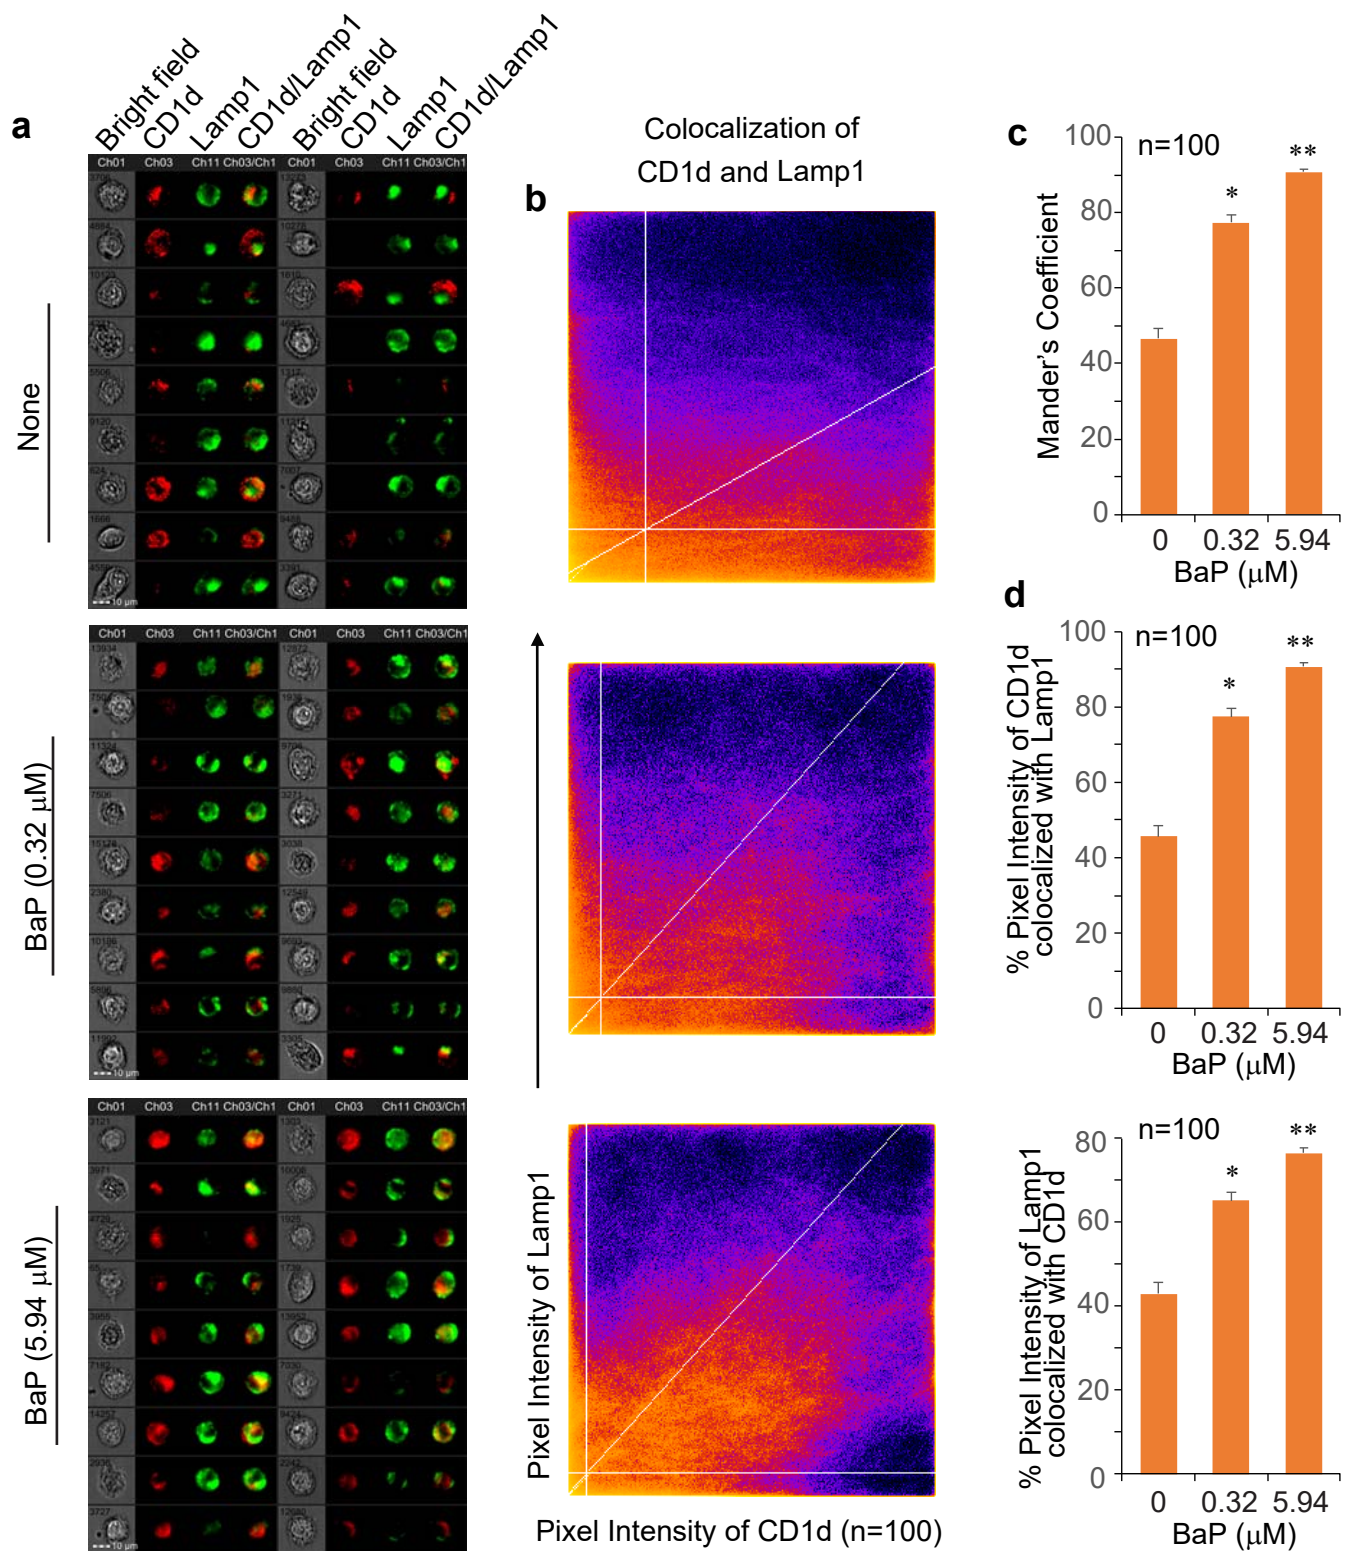

**Supplemental Figure 7:** CD1d protein retained in late endocytic compartments with a duplicated analysis using 100 cellular images. Cellular images from the gated HLA-DR<sup>+</sup>CD11c<sup>+</sup>CD1d<sup>+</sup>Lamp1<sup>+</sup> human DCs are shown together with cell identities and size bars (a). A hundred of cell images with strong co-stain and clear subcellular localization of CD1d and Lamp1 proteins were extracted as exemplified in Supplemental Fig. 5 for analysis using ImageJ-Fiji. The co-localization analyses were shown with scatterplots (b) and quantified with an Mander's coefficient for co-localized areas (c). The percentage of co-localized pixel intensity is also shown (d). Statistical analyses were similarly performed as in Fig. 6.



**Supplemental Table 1: Gene expression altered by BaP exposure (0.32mM) in human DCs**

| Gene_name       | Fold_change | Log2(Fold_change) | FDR_adjusted_p |
|-----------------|-------------|-------------------|----------------|
| EDA2R           | 1720.58     | 10.75             | 2.31E-20       |
| PADI4           | 342.85      | 8.42              | 4.64E-24       |
| PTCHD4          | 111.71      | 6.80              | 1.63E-03       |
| TSPAN11         | 66.81       | 6.06              | 1.25E-02       |
| CXCL10          | 44.51       | 5.48              | 2.50E-02       |
| CCL1            | 33.06       | 5.05              | 2.52E-02       |
| PLXNA2          | 25.18       | 4.65              | 7.62E-08       |
| TLR10           | 22.39       | 4.48              | 4.11E-02       |
| KRT17           | 19.62       | 4.29              | 6.31E-38       |
| SPATA18         | 19.03       | 4.25              | 1.01E-06       |
| ACTA2           | 18.02       | 4.17              | 6.63E-43       |
| VWCE            | 17.19       | 4.10              | 2.69E-13       |
| GPR162          | 15.81       | 3.98              | 3.75E-02       |
| CD101           | 15.03       | 3.91              | 1.23E-15       |
| GDF15           | 14.19       | 3.83              | 2.37E-08       |
| LRP5            | 13.90       | 3.80              | 4.03E-04       |
| FCRL1           | 13.87       | 3.79              | 1.20E-02       |
| RP11-506M13.3   | 11.63       | 3.54              | 1.15E-02       |
| C7orf57         | 10.48       | 3.39              | 6.80E-08       |
| CXCR2           | 10.01       | 3.32              | 3.89E-03       |
| AIRE            | 9.74        | 3.28              | 2.55E-02       |
| PLK2            | 8.36        | 3.06              | 1.35E-03       |
| TNFSF10         | 7.20        | 2.85              | 1.22E-06       |
| TNFRSF10C       | 6.95        | 2.80              | 5.53E-05       |
| MDM2            | 6.58        | 2.72              | 9.69E-50       |
| PLAT            | 6.35        | 2.67              | 5.23E-05       |
| VSTM2L          | 6.30        | 2.66              | 5.74E-03       |
| FDXR            | 6.21        | 2.64              | 3.22E-04       |
| MLXIPL          | 6.17        | 2.63              | 2.27E-02       |
| ARHGAP6         | 5.94        | 2.57              | 3.52E-05       |
| FAS             | 5.88        | 2.56              | 1.93E-35       |
| PLSCR1          | 5.61        | 2.49              | 4.69E-08       |
| PVT1            | 5.54        | 2.47              | 2.92E-03       |
| VCAN            | 5.04        | 2.33              | 1.24E-05       |
| EGR1            | 4.85        | 2.28              | 1.13E-04       |
| CTD-2547L24.3   | 4.69        | 2.23              | 1.59E-06       |
| CLCN4           | 4.62        | 2.21              | 7.78E-07       |
| MS4A1           | 4.43        | 2.15              | 2.16E-03       |
| DDB2            | 4.34        | 2.12              | 1.05E-28       |
| FAM157C         | 4.31        | 2.11              | 3.82E-02       |
| FAM212B,FAM212B | 4.20        | 2.07              | 3.54E-14       |
| IFIT1           | 4.15        | 2.05              | 1.34E-03       |
| TRIM22          | 4.02        | 2.01              | 5.43E-29       |
| ZNF530          | 3.97        | 1.99              | 3.75E-02       |
| CYFIP2          | 3.91        | 1.97              | 4.66E-11       |

|           |      |      |          |
|-----------|------|------|----------|
| RSAD2     | 3.88 | 1.95 | 3.32E-05 |
| ALOX5     | 3.85 | 1.94 | 1.64E-04 |
| SEC14L5   | 3.81 | 1.93 | 2.97E-02 |
| SECTM1    | 3.75 | 1.91 | 1.60E-02 |
| ARAP3     | 3.66 | 1.87 | 4.49E-02 |
| ATP8B4    | 3.66 | 1.87 | 6.40E-08 |
| CMPK2     | 3.49 | 1.80 | 8.10E-04 |
| TAF9B     | 3.47 | 1.80 | 6.60E-05 |
| PPP2R2B   | 3.47 | 1.79 | 3.38E-03 |
| NFATC2    | 3.46 | 1.79 | 7.19E-09 |
| NCF1      | 3.38 | 1.76 | 2.51E-04 |
| CKLF      | 3.38 | 1.76 | 2.82E-03 |
| CDR2L     | 3.32 | 1.73 | 2.71E-09 |
| PCNA      | 3.31 | 1.73 | 7.20E-20 |
| IFIT2     | 3.29 | 1.72 | 8.51E-04 |
| ENC1      | 3.28 | 1.71 | 1.24E-07 |
| IFIT3     | 3.26 | 1.70 | 8.98E-03 |
| FAM189A2  | 3.23 | 1.69 | 3.94E-02 |
| LILRA1    | 3.16 | 1.66 | 9.57E-06 |
| TMEM154   | 3.15 | 1.66 | 3.68E-02 |
| SMAD3     | 3.15 | 1.65 | 4.65E-02 |
| HIC1      | 3.12 | 1.64 | 1.30E-02 |
| RPS27L    | 3.09 | 1.63 | 8.15E-08 |
| ARHGGEF3  | 3.05 | 1.61 | 6.39E-26 |
| POLH      | 3.05 | 1.61 | 1.20E-06 |
| EREG      | 3.03 | 1.60 | 1.63E-03 |
| SESN1     | 3.00 | 1.59 | 5.26E-07 |
| SEMA6B    | 2.99 | 1.58 | 2.59E-02 |
| CACNA2D4  | 2.84 | 1.51 | 6.87E-05 |
| LPAR6     | 2.83 | 1.50 | 7.20E-09 |
| AEN       | 2.82 | 1.50 | 7.55E-07 |
| MX2       | 2.74 | 1.46 | 4.13E-02 |
| TPM2      | 2.71 | 1.44 | 4.08E-02 |
| HERC5     | 2.71 | 1.44 | 2.39E-02 |
| RRM2B     | 2.69 | 1.43 | 1.14E-13 |
| PLEKHA6   | 2.68 | 1.42 | 2.37E-02 |
| GCNT1     | 2.68 | 1.42 | 1.69E-04 |
| TIFAB     | 2.67 | 1.42 | 1.84E-09 |
| ZMAT3     | 2.64 | 1.40 | 3.34E-18 |
| CHN2,CHN2 | 2.64 | 1.40 | 2.28E-06 |
| BBC3      | 2.63 | 1.39 | 1.32E-03 |
| ATP5EP2   | 2.58 | 1.37 | 2.26E-02 |
| TMEM30A   | 2.57 | 1.36 | 3.18E-14 |
| ADORA3    | 2.54 | 1.34 | 5.64E-05 |
| MX1       | 2.53 | 1.34 | 2.41E-02 |
| OAS2      | 2.51 | 1.33 | 2.07E-02 |
| ADA       | 2.51 | 1.33 | 4.65E-02 |

|              |      |      |          |
|--------------|------|------|----------|
| ISYNA1       | 2.50 | 1.32 | 5.48E-10 |
| TVP23A       | 2.49 | 1.32 | 3.15E-02 |
| OLR1         | 2.48 | 1.31 | 4.76E-03 |
| KDELC2       | 2.46 | 1.30 | 2.34E-03 |
| REV3L        | 2.43 | 1.28 | 1.71E-06 |
| DGKA         | 2.41 | 1.27 | 5.35E-06 |
| RAB15        | 2.40 | 1.26 | 3.45E-03 |
| TRIAP1       | 2.39 | 1.25 | 1.08E-07 |
| APOBEC3C     | 2.35 | 1.23 | 6.01E-13 |
| RCBTB2       | 2.33 | 1.22 | 1.41E-12 |
| PHLDA3       | 2.31 | 1.21 | 1.22E-03 |
| PHPT1        | 2.31 | 1.21 | 3.15E-02 |
| WWC3         | 2.28 | 1.19 | 3.48E-07 |
| ICAM3        | 2.28 | 1.19 | 3.45E-03 |
| SAMD9        | 2.27 | 1.18 | 1.72E-04 |
| NLRP3        | 2.26 | 1.17 | 2.02E-03 |
| FGL2         | 2.21 | 1.14 | 4.43E-10 |
| STXBP5       | 2.20 | 1.14 | 7.58E-11 |
| CTD-2228K2.7 | 2.19 | 1.13 | 2.16E-04 |
| TIPARP       | 2.19 | 1.13 | 6.41E-06 |
| EPHB2        | 2.18 | 1.13 | 1.89E-02 |
| F3           | 2.18 | 1.13 | 1.07E-03 |
| FA2H         | 2.18 | 1.13 | 5.16E-03 |
| MMP12        | 2.17 | 1.12 | 7.82E-07 |
| LINC00926    | 2.17 | 1.12 | 5.51E-04 |
| TBL1X        | 2.16 | 1.11 | 1.34E-03 |
| RGS12        | 2.13 | 1.09 | 6.09E-05 |
| PLEKHG5      | 2.13 | 1.09 | 3.35E-08 |
| SESN2        | 2.13 | 1.09 | 1.91E-04 |
| GIN1         | 2.12 | 1.09 | 6.48E-03 |
| XAF1         | 2.09 | 1.07 | 2.37E-02 |
| DDX60L       | 2.09 | 1.06 | 6.03E-03 |
| TMEM45B      | 2.08 | 1.06 | 1.27E-05 |
| PDP1         | 2.08 | 1.06 | 7.86E-03 |
| STK38L       | 2.07 | 1.05 | 1.11E-06 |
| EPB41L3      | 2.07 | 1.05 | 9.39E-07 |
| PTP4A1       | 2.07 | 1.05 | 4.26E-08 |
| SLC30A4      | 2.06 | 1.05 | 6.31E-04 |
| CCND2        | 2.06 | 1.04 | 1.54E-05 |
| DEF6         | 2.05 | 1.04 | 2.42E-03 |
| EPSTI1       | 2.05 | 1.03 | 4.29E-02 |
| NET1         | 2.05 | 1.03 | 1.01E-06 |
| CASS4        | 2.04 | 1.03 | 4.53E-05 |
| RASSF5       | 2.04 | 1.03 | 9.02E-10 |
| ZNF107       | 2.03 | 1.02 | 3.50E-02 |
| PIDD1        | 2.03 | 1.02 | 1.85E-02 |
| CDH2         | 2.03 | 1.02 | 1.05E-02 |

|               |      |       |          |
|---------------|------|-------|----------|
| IFI44         | 2.03 | 1.02  | 3.98E-02 |
| TNFRSF10B     | 2.02 | 1.02  | 6.17E-08 |
| NPC1          | 0.50 | -1.00 | 1.46E-05 |
| ADPGK-AS1     | 0.50 | -1.00 | 2.76E-02 |
| PPP2R3A       | 0.50 | -1.00 | 2.74E-05 |
| RABEPK        | 0.50 | -1.00 | 2.69E-07 |
| LAMP1         | 0.50 | -1.01 | 2.28E-06 |
| ABHD4         | 0.50 | -1.01 | 3.33E-05 |
| SLC26A11      | 0.50 | -1.01 | 7.94E-04 |
| RP11-701P16.5 | 0.49 | -1.02 | 2.18E-02 |
| ECHDC3        | 0.49 | -1.03 | 4.40E-02 |
| RRAGD         | 0.49 | -1.03 | 6.39E-05 |
| SCD           | 0.49 | -1.03 | 1.01E-08 |
| SLC1A3        | 0.49 | -1.03 | 2.74E-05 |
| TNFAIP6       | 0.49 | -1.03 | 1.98E-02 |
| METTL21B      | 0.49 | -1.03 | 1.03E-05 |
| TXNDC16       | 0.49 | -1.03 | 9.22E-04 |
| MACC1         | 0.49 | -1.04 | 5.61E-03 |
| MGLL          | 0.49 | -1.04 | 5.98E-05 |
| CAMK2D        | 0.48 | -1.05 | 1.17E-07 |
| AKR1B1        | 0.48 | -1.05 | 7.31E-08 |
| TSPAN7        | 0.48 | -1.05 | 1.55E-02 |
| KIAA1161      | 0.48 | -1.06 | 4.38E-06 |
| ASAH1         | 0.48 | -1.06 | 8.49E-05 |
| MS4A6A        | 0.48 | -1.06 | 3.06E-07 |
| NPL           | 0.48 | -1.06 | 3.01E-08 |
| UBBP4         | 0.48 | -1.07 | 1.10E-02 |
| AK4           | 0.48 | -1.07 | 6.62E-03 |
| RAB33A        | 0.48 | -1.07 | 7.39E-04 |
| CPM           | 0.48 | -1.07 | 1.09E-10 |
| NPHP4         | 0.48 | -1.07 | 3.94E-02 |
| CYP27A1       | 0.48 | -1.07 | 1.05E-04 |
| MARCKS        | 0.47 | -1.08 | 8.56E-04 |
| SLC25A35      | 0.47 | -1.08 | 2.40E-04 |
| MEX3B         | 0.47 | -1.08 | 3.21E-03 |
| CCL22         | 0.47 | -1.08 | 2.05E-07 |
| HS6ST1        | 0.47 | -1.09 | 1.22E-05 |
| MARCH9*       | 0.47 | -1.09 | 3.41E-02 |
| TMPRSS13      | 0.47 | -1.09 | 1.19E-02 |
| AHNAK2        | 0.47 | -1.09 | 5.31E-05 |
| NHSL1         | 0.47 | -1.10 | 4.14E-02 |
| CCL13         | 0.47 | -1.10 | 3.23E-04 |
| FTCDNL1       | 0.47 | -1.10 | 4.08E-02 |
| SMPD1         | 0.46 | -1.11 | 1.99E-06 |
| HYAL3         | 0.46 | -1.11 | 4.54E-03 |
| MARCH3*       | 0.46 | -1.11 | 3.17E-03 |
| CCND1         | 0.46 | -1.11 | 1.28E-06 |

|                |      |       |          |
|----------------|------|-------|----------|
| FZD7           | 0.46 | -1.11 | 1.44E-02 |
| TNS3           | 0.46 | -1.12 | 2.82E-11 |
| TAGLN          | 0.46 | -1.13 | 1.60E-02 |
| WFS1           | 0.46 | -1.13 | 4.43E-06 |
| HLA-J          | 0.46 | -1.13 | 4.11E-02 |
| CTSB           | 0.46 | -1.13 | 1.55E-08 |
| CHI3L1         | 0.46 | -1.13 | 4.13E-05 |
| C5AR1          | 0.46 | -1.13 | 2.37E-02 |
| SYT1           | 0.46 | -1.13 | 4.89E-06 |
| CD59           | 0.46 | -1.13 | 1.84E-07 |
| GM2A           | 0.46 | -1.13 | 3.10E-07 |
| GJB2           | 0.45 | -1.14 | 9.69E-04 |
| IL18           | 0.45 | -1.14 | 8.09E-04 |
| NRP2           | 0.45 | -1.14 | 3.03E-11 |
| RP11-134L10.1  | 0.45 | -1.14 | 2.07E-02 |
| STEAP3         | 0.45 | -1.15 | 1.81E-04 |
| ITGA6          | 0.45 | -1.15 | 2.82E-05 |
| LGR4           | 0.45 | -1.15 | 1.72E-06 |
| ST6GAL1        | 0.45 | -1.15 | 6.46E-12 |
| NOTCH3         | 0.45 | -1.15 | 8.56E-04 |
| SAMD4A         | 0.45 | -1.15 | 1.10E-05 |
| ABCG2          | 0.45 | -1.16 | 1.14E-05 |
| PPP1R16B       | 0.45 | -1.16 | 6.01E-13 |
| STRIP2         | 0.45 | -1.16 | 8.70E-03 |
| FAM20A         | 0.45 | -1.16 | 2.38E-07 |
| CHST7          | 0.45 | -1.16 | 7.29E-05 |
| CD22           | 0.45 | -1.17 | 5.21E-03 |
| STMN1          | 0.44 | -1.18 | 1.51E-02 |
| DTX4           | 0.44 | -1.18 | 5.26E-03 |
| LRWD1          | 0.44 | -1.19 | 3.94E-02 |
| MFI2           | 0.44 | -1.20 | 1.01E-03 |
| RP5-839B4.8    | 0.43 | -1.20 | 5.42E-03 |
| ARID5B         | 0.43 | -1.21 | 2.13E-06 |
| PC             | 0.43 | -1.21 | 1.70E-07 |
| CR1            | 0.43 | -1.21 | 7.19E-09 |
| PPARG          | 0.43 | -1.22 | 2.42E-05 |
| FABP4          | 0.43 | -1.22 | 1.60E-10 |
| MAP1A          | 0.43 | -1.23 | 4.13E-08 |
| SLC18A2        | 0.42 | -1.24 | 9.48E-07 |
| TUT1           | 0.42 | -1.26 | 3.50E-02 |
| MSR1           | 0.42 | -1.27 | 5.40E-03 |
| SLC7A7         | 0.42 | -1.27 | 8.56E-10 |
| SMAD6          | 0.42 | -1.27 | 3.86E-03 |
| HSD11B1        | 0.42 | -1.27 | 2.38E-08 |
| RP11-1008C21.1 | 0.41 | -1.27 | 1.15E-02 |
| MMP14          | 0.41 | -1.28 | 6.49E-05 |
| EPB41L1        | 0.41 | -1.28 | 2.31E-05 |

|             |      |       |          |
|-------------|------|-------|----------|
| DYSF        | 0.41 | -1.28 | 1.83E-07 |
| SH3BP5      | 0.41 | -1.28 | 6.08E-04 |
| DCSTAMP     | 0.41 | -1.28 | 1.45E-06 |
| DNASE2      | 0.41 | -1.29 | 3.33E-02 |
| S100A9      | 0.41 | -1.29 | 4.81E-03 |
| CTSD        | 0.41 | -1.30 | 2.35E-06 |
| PAPSS2      | 0.41 | -1.30 | 1.58E-04 |
| RAB32       | 0.41 | -1.30 | 1.62E-11 |
| CCDC85C     | 0.40 | -1.30 | 8.10E-03 |
| SYNGR1      | 0.40 | -1.31 | 3.70E-02 |
| SLC2A8      | 0.40 | -1.31 | 4.14E-02 |
| DEXI        | 0.40 | -1.31 | 4.39E-02 |
| CLU         | 0.40 | -1.32 | 1.74E-03 |
| PMP22       | 0.40 | -1.32 | 8.07E-06 |
| RAB42       | 0.40 | -1.32 | 8.50E-04 |
| PFKM        | 0.40 | -1.33 | 4.96E-03 |
| KIAA1462    | 0.40 | -1.33 | 8.56E-10 |
| ADGRB1      | 0.40 | -1.33 | 2.65E-03 |
| CXCR4       | 0.39 | -1.35 | 5.51E-09 |
| CDS1        | 0.39 | -1.35 | 2.28E-02 |
| TNIK        | 0.39 | -1.35 | 4.38E-06 |
| SULT1C2     | 0.39 | -1.36 | 6.73E-03 |
| ASTN2       | 0.39 | -1.36 | 2.07E-03 |
| TTN         | 0.39 | -1.36 | 2.02E-02 |
| MARCO       | 0.39 | -1.36 | 4.69E-04 |
| CACNA1G     | 0.39 | -1.37 | 6.08E-03 |
| LHFP        | 0.39 | -1.37 | 1.24E-07 |
| SLC1A2      | 0.39 | -1.37 | 1.76E-05 |
| ITGB5       | 0.39 | -1.37 | 1.32E-03 |
| C9orf139    | 0.39 | -1.37 | 4.17E-03 |
| FAM110B     | 0.38 | -1.39 | 5.06E-09 |
| THBS3       | 0.38 | -1.39 | 9.48E-07 |
| DHCR7       | 0.38 | -1.39 | 3.27E-06 |
| IGHE        | 0.38 | -1.40 | 4.99E-02 |
| PDE3B       | 0.37 | -1.43 | 4.13E-07 |
| SLC12A8     | 0.37 | -1.43 | 3.55E-02 |
| IL1RN       | 0.37 | -1.44 | 2.14E-12 |
| ACP2        | 0.37 | -1.45 | 2.96E-13 |
| CTA-363E6.1 | 0.36 | -1.46 | 8.02E-05 |
| VCAM1       | 0.36 | -1.47 | 2.60E-02 |
| PSD3        | 0.36 | -1.48 | 1.10E-05 |
| GAL         | 0.36 | -1.49 | 1.30E-02 |
| SYT6        | 0.36 | -1.49 | 1.77E-02 |
| CLDN23      | 0.36 | -1.49 | 1.25E-08 |
| BCAT1       | 0.35 | -1.50 | 1.56E-05 |
| RAPGEF3     | 0.35 | -1.50 | 4.28E-04 |
| PVRL1       | 0.35 | -1.51 | 1.82E-09 |

|            |      |       |          |
|------------|------|-------|----------|
| PCSK5      | 0.35 | -1.51 | 1.84E-09 |
| MT1E       | 0.35 | -1.52 | 4.75E-03 |
| CYP19A1    | 0.35 | -1.53 | 4.86E-02 |
| ZBED6CL    | 0.34 | -1.54 | 2.41E-04 |
| PRRT3      | 0.34 | -1.54 | 5.93E-04 |
| NFIA       | 0.34 | -1.56 | 1.94E-02 |
| SIGLEC15   | 0.34 | -1.56 | 2.96E-04 |
| RTN4R      | 0.34 | -1.56 | 5.04E-05 |
| PDIA5      | 0.34 | -1.56 | 3.67E-03 |
| IFITM10    | 0.33 | -1.60 | 7.73E-03 |
| UCHL1      | 0.33 | -1.61 | 1.27E-08 |
| MANEAL     | 0.33 | -1.62 | 1.50E-04 |
| RNASE1     | 0.32 | -1.64 | 9.26E-04 |
| LINC00607  | 0.32 | -1.64 | 1.46E-03 |
| GRB10      | 0.32 | -1.65 | 1.25E-02 |
| MT1F       | 0.32 | -1.66 | 9.22E-04 |
| CTSL       | 0.32 | -1.67 | 9.97E-09 |
| AFAP1L1    | 0.31 | -1.67 | 3.62E-04 |
| WBP5       | 0.31 | -1.69 | 4.55E-02 |
| ITGAD      | 0.31 | -1.69 | 2.00E-02 |
| AC004988.1 | 0.31 | -1.70 | 1.40E-03 |
| ST8SIA6    | 0.31 | -1.71 | 5.14E-04 |
| TTC28      | 0.31 | -1.71 | 6.10E-03 |
| CYP27B1    | 0.30 | -1.73 | 5.45E-10 |
| DNAJC12    | 0.30 | -1.74 | 3.88E-03 |
| WVOX       | 0.30 | -1.74 | 1.85E-02 |
| EPDR1      | 0.30 | -1.75 | 1.05E-09 |
| HHLA2      | 0.29 | -1.77 | 1.46E-05 |
| RBFOX2     | 0.29 | -1.80 | 4.12E-02 |
| RPS6KA2    | 0.29 | -1.81 | 1.76E-05 |
| C1S        | 0.28 | -1.81 | 1.33E-02 |
| ADAMTS15   | 0.28 | -1.82 | 1.46E-03 |
| GGH        | 0.28 | -1.83 | 1.71E-02 |
| ZRANB3     | 0.28 | -1.84 | 1.74E-02 |
| DTNB       | 0.28 | -1.85 | 4.77E-02 |
| ROR1-AS1   | 0.28 | -1.86 | 1.61E-11 |
| CD163      | 0.27 | -1.88 | 7.35E-05 |
| DPYSL3     | 0.27 | -1.89 | 1.50E-02 |
| LINC00520  | 0.26 | -1.92 | 5.77E-08 |
| NR1H3      | 0.26 | -1.92 | 7.91E-19 |
| COL5A3     | 0.26 | -1.97 | 4.44E-04 |
| SPARC      | 0.25 | -1.99 | 7.49E-05 |
| PAM        | 0.25 | -1.99 | 5.59E-09 |
| DNAJC6     | 0.25 | -2.02 | 5.54E-04 |
| FAM101B    | 0.25 | -2.03 | 1.96E-03 |
| RARRES1    | 0.25 | -2.03 | 1.91E-03 |
| IL22RA2    | 0.24 | -2.05 | 6.17E-08 |

|             |      |       |          |
|-------------|------|-------|----------|
| CABLES1     | 0.24 | -2.06 | 3.78E-03 |
| AKR1C1      | 0.24 | -2.06 | 2.07E-08 |
| EGLN3       | 0.24 | -2.07 | 7.77E-08 |
| NCKAP5      | 0.24 | -2.08 | 9.97E-06 |
| SHROOM3     | 0.24 | -2.09 | 7.10E-03 |
| APOE        | 0.23 | -2.09 | 8.41E-04 |
| TNIP3       | 0.23 | -2.09 | 2.60E-02 |
| DNASE1L3    | 0.22 | -2.16 | 2.96E-11 |
| FAR2        | 0.21 | -2.23 | 5.75E-11 |
| CCL26       | 0.21 | -2.27 | 9.13E-03 |
| ELOVL7      | 0.20 | -2.32 | 8.07E-03 |
| ABCC2       | 0.19 | -2.36 | 6.27E-07 |
| APBB2       | 0.19 | -2.38 | 4.45E-06 |
| CCL23       | 0.19 | -2.40 | 2.26E-09 |
| HS3ST2      | 0.19 | -2.41 | 6.51E-07 |
| ALDH1A1     | 0.19 | -2.42 | 1.91E-06 |
| AC007743.1  | 0.19 | -2.43 | 4.87E-02 |
| SLC28A3     | 0.18 | -2.46 | 1.12E-06 |
| ME3         | 0.17 | -2.54 | 1.20E-06 |
| CES1        | 0.17 | -2.57 | 7.90E-05 |
| DNAJC5B     | 0.17 | -2.60 | 6.34E-05 |
| AKR1C3      | 0.16 | -2.69 | 2.37E-04 |
| CCL18       | 0.16 | -2.69 | 2.10E-04 |
| CCL15       | 0.15 | -2.74 | 1.56E-05 |
| GCNT3       | 0.15 | -2.75 | 1.34E-02 |
| NBEA        | 0.15 | -2.76 | 5.02E-03 |
| ZNF575      | 0.14 | -2.80 | 2.96E-02 |
| GS1-600G8.5 | 0.13 | -2.93 | 7.31E-29 |
| CHDH        | 0.13 | -2.95 | 3.08E-03 |
| DAAM2       | 0.11 | -3.13 | 1.26E-02 |
| COBL        | 0.11 | -3.15 | 1.17E-07 |
| CYYR1       | 0.11 | -3.23 | 4.55E-03 |
| TMEM200A    | 0.11 | -3.24 | 3.08E-02 |
| MT1G        | 0.11 | -3.24 | 2.11E-05 |
| DYNC111     | 0.10 | -3.26 | 1.31E-02 |
| C8orf46     | 0.09 | -3.50 | 3.02E-02 |
| LINC00639   | 0.08 | -3.56 | 4.04E-04 |
| HSD3BP5     | 0.08 | -3.60 | 1.63E-03 |
| PBX4        | 0.08 | -3.65 | 7.15E-03 |
| WASF3       | 0.08 | -3.72 | 4.70E-02 |
| RP4-644L1.2 | 0.07 | -3.78 | 3.35E-02 |
| RN7SKP26    | 0.07 | -3.81 | 3.64E-02 |
| FAM19A4     | 0.07 | -3.84 | 6.49E-05 |
| SDK1        | 0.05 | -4.27 | 3.18E-02 |
| PTPRM       | 0.05 | -4.42 | 1.02E-04 |
| ANK2        | 0.00 | -8.58 | 1.68E-08 |
| AC069363.1  | 0.00 | -8.70 | 4.46E-05 |
